# Supplementary material for: Monitoring the progress of health-related sustainable development goals (SDGs) in Brazilian states using the Global Burden of Disease indicators
Source: Springer Nature journal article supplement (doi:10.1186/s12963-020-00207-2), 2020-09-01
Supplement: MOESM1 [file 18433928]

| Indicators                      | Brazil | North |       |          |          |         |      |           | Central-west     |       |             |                    | Northeast |       |       |          |         |            |       | Southeast           |         |                |              | South     |                |        |                   |                |
|---------------------------------|--------|-------|-------|----------|----------|---------|------|-----------|------------------|-------|-------------|--------------------|-----------|-------|-------|----------|---------|------------|-------|---------------------|---------|----------------|--------------|-----------|----------------|--------|-------------------|----------------|
|                                 |        | Acre  | Amapa | Amazonas | Rondonia | Roraima | Para | Tocantins | Distrito Federal | Goiás | Mato Grosso | Mato Grosso do Sul | Alagoas   | Bahia | Ceara | Maranhao | Paraiba | Pernambuco | Piaui | Rio Grande do Norte | Sergipe | Espirito Santo | Minas Gerais | Sao Paulo | Rio de Janeiro | Parana | Rio Grande do Sul | Santa Catarina |
| 1.5.1: Disaster Mort            | 0.0    | 0.0   | 0.0   | 0.0      | 0.0      | 0.0     | 0.0  | 0.0       | 0.0              | 0.0   | 0.0         | 0.0                | 0.0       | 0.0   | 0.0   | 0.0      | 0.1     | 0.0        | 0.0   | 0.0                 | 0.0     | 0.0            | 0.0          | 0.0       | 0.0            | 0.0    | 0.0               | 0.0            |
| 2.2.1: Child Stunting           | 9.7    | 13.9  | 9.5   | 11.9     | 10.4     | 7.7     | 13.6 | 11.2      | 6.3              | 9.0   | 9.0         | 7.2                | 12.8      | 11.9  | 12.7  | 17.6     | 12.2    | 11.6       | 14.4  | 9.8                 | 9.8     | 7.3            | 7.6          | 6.7       | 6.8            | 7.2    | 6.5               | 4.6            |
| 2.2.2a: Child Wasting           | 1.2    | 1.5   | 1.2   | 1.2      | 0.7      | 0.6     | 1.1  | 1.1       | 1.0              | 1.3   | 0.6         | 0.9                | 2.4       | 1.6   | 1.3   | 2.3      | 1.5     | 1.6        | 2.2   | 1.4                 | 0.8     | 0.7            | 0.9          | 0.9       | 1.4            | 0.6    | 0.7               | 0.4            |
| 2.2.2b: Child Overweight        | 31     | 28    | 30    | 29       | 27       | 28      | 24   | 24        | 49               | 33    | 33          | 30                 | 29        | 25    | 28    | 20       | 26      | 28         | 25    | 27                  | 26      | 31             | 29           | 36        | 36             | 35     | 37                | 38             |
| 3.1.1: Mat Mort Ratio           | 67     | 60    | 87    | 94       | 88       | 50      | 72   | 68        | 54               | 62    | 78          | 90                 | 57        | 65    | 51    | 66       | 53      | 56         | 70    | 47                  | 65      | 59             | 61           | 68        | 103            | 77     | 80                | 47             |
| 3.1.2: Skilled Birth Attend     | 99     | 97    | 100   | 97       | 100      | 99      | 98   | 98        | 100              | 100   | 100         | 100                | 98        | 98    | 98    | 97       | 99      | 98         | 96    | 99                  | 100     | 100            | 100          | 100       | 100            | 100    | 100               | 100            |
| 3.2.1: Under-5 Mort             | 18     | 27    | 27    | 21       | 19       | 22      | 21   | 20        | 14               | 18    | 20          | 18                 | 21        | 23    | 19    | 21       | 15      | 20         | 20    | 16                  | 21      | 17             | 16           | 16        | 18             | 17     | 15                | 16             |
| 3.2.2: Neonatal Mort            | 8.5    | 13.6  | 15.4  | 10.1     | 9.6      | 9.4     | 9.0  | 10.2      | 8.8              | 10.3  | 9.7         | 8.7                | 7.8       | 8.6   | 7.5   | 7.8      | 5.6     | 8.1        | 10.6  | 5.1                 | 10.3    | 8.9            | 7.8          | 8.4       | 9.1            | 8.1    | 8.1               | 8.2            |
| 3.3.1: HIV Incid                | 0.4    | 0.2   | 0.3   | 0.5      | 0.2      | 0.2     | 0.5  | 0.2       | 0.2              | 0.2   | 0.3         | 0.3                | 0.3       | 0.3   | 0.3   | 0.4      | 0.2     | 0.3        | 0.3   | 0.2                 | 0.2     | 0.2            | 0.2          | 0.2       | 0.4            | 0.2    | 0.4               | 0.3            |
| 3.3.2: TB Incid                 | 36     | 61    | 51    | 80       | 28       | 45      | 47   | 23        | 23               | 19    | 42          | 37                 | 32        | 37    | 39    | 40       | 29      | 47         | 35    | 33                  | 30      | 26             | 26           | 32        | 55             | 22     | 41                | 23             |
| 3.3.3: Malaria Incid            | 1.0    | 33.0  | 23.4  | 20.3     | 13.3     | 27.2    | 3.7  | 0.0       | 0.0              | 0.0   | 0.5         | 0.0                | 0.0       | 0.0   | 0.0   | 0.3      | 0.0     | 0.0        | 0.0   | 0.0                 | 0.0     | 0.0            | 0.0          | 0.0       | 0.0            | 0.0    | 0.0               | 0.0            |
| 3.3.4: Hep B Incid              | 1259   | 2002  | 1151  | 1446     | 1410     | 1549    | 1502 | 1102      | 1122             | 1139  | 1154        | 1173               | 1513      | 1229  | 1134  | 1322     | 1414    | 1493       | 1238  | 1213                | 1377    | 997            | 1167         | 1261      | 1215           | 1250   | 1232              | 1158           |
| 3.3.5: NTD Prev                 | 10.1   | 7.4   | 6.2   | 6.3      | 10.9     | 6.2     | 11.2 | 6.8       | 24.7             | 16.4  | 5.9         | 5.8                | 9.8       | 8.8   | 6.3   | 9.4      | 7.3     | 12.7       | 8.1   | 5.9                 | 7.7     | 6.3            | 18.1         | 11.3      | 6.7            | 5.8    | 4.8               | 5.1            |
| 3.4.1: NCD Mort                 | 330    | 293   | 307   | 289      | 312      | 290     | 307  | 286       | 247              | 306   | 297         | 339                | 365       | 329   | 266   | 311      | 329     | 384        | 283   | 301                 | 313     | 293            | 306          | 335       | 398            | 336    | 352               | 305            |
| 3.4.2: Suicide Mort             | 6.0    | 6.5   | 6.4   | 6.2      | 6.4      | 8.3     | 3.9  | 7.1       | 4.0              | 6.8   | 5.6         | 8.0                | 3.7       | 5.2   | 6.7   | 3.9      | 5.0     | 5.3        | 7.8   | 7.2                 | 6.8     | 4.0            | 7.1          | 5.3       | 4.2            | 6.7    | 10.3              | 8.3            |
| 3.5.2: Alcohol Use              | 17     | 14    | 15    | 15       | 16       | 15      | 14   | 15        | 20               | 17    | 17          | 17                 | 15        | 16    | 16    | 14       | 16      | 16         | 15    | 17                  | 16      | 18             | 17           | 19        | 19             | 18     | 19                | 18             |
| 3.6.1: Road Inj Mort            | 20     | 17    | 18    | 14       | 30       | 29      | 20   | 34        | 17               | 26    | 29          | 24                 | 22        | 19    | 23    | 21       | 23      | 22         | 30    | 20                  | 26      | 22             | 20           | 15        | 19             | 25     | 17                | 24             |
| 3.7.1: FP Need Met, Mod         | 88     | 87    | 89    | 87       | 89       | 88      | 85   | 86        | 90               | 94    | 91          | 92                 | 83        | 83    | 82    | 82       | 84      | 84         | 85    | 88                  | 85      | 92             | 86           | 90        | 91             | 86     | 91                | 90             |
| 3.7.2: Adol Birth Rate          | 27     | 39    | 33    | 41       | 29       | 42      | 37   | 36        | 20               | 27    | 29          | 32                 | 34        | 28    | 24    | 47       | 27      | 31         | 28    | 28                  | 26      | 24             | 20           | 22        | 25             | 25     | 22                | 19             |
| 3.9.1: Air Poll Mort            | 24     | 25    | 21    | 20       | 26       | 23      | 25   | 25        | 33               | 35    | 26          | 24                 | 24        | 23    | 18    | 24       | 21      | 24         | 21    | 17                  | 19      | 19             | 24           | 25        | 31             | 22     | 24                | 21             |
| 3.9.2: WaSH Mort                | 3.6    | 6.0   | 4.0   | 6.2      | 5.2      | 6.0     | 6.1  | 3.4       | 1.7              | 2.5   | 3.4         | 4.1                | 7.4       | 5.0   | 4.8   | 5.6      | 4.3     | 5.8        | 5.0   | 4.2                 | 4.7     | 2.1            | 2.6          | 2.3       | 2.8            | 2.7    | 1.9               | 2.2            |
| 3.9.3: Poisoning Mort           | 0.2    | 0.2   | 0.2   | 0.2      | 0.3      | 0.3     | 0.2  | 0.3       | 0.2              | 0.2   | 0.3         | 0.2                | 0.1       | 0.2   | 0.1   | 0.2      | 0.2     | 0.1        | 0.2   | 0.2                 | 0.2     | 0.1            | 0.2          | 0.1       | 0.3            | 0.2    | 0.2               | 0.1            |
| 3.a.1: Smoking Prev             | 9.5    | 9.3   | 7.5   | 6.7      | 8.7      | 7.3     | 7.2  | 7.2       | 9.5              | 8.8   | 9.1         | 10.7               | 6.8       | 5.8   | 6.8   | 5.9      | 7.1     | 8.6        | 6.8   | 7.1                 | 6.2     | 7.6            | 9.8          | 12.2      | 9.7            | 12.4   | 12.8              | 10.2           |
| 3.b.1: Vaccine Cov              | 92     | 85    | 87    | 91       | 97       | 93      | 82   | 92        | 98               | 93    | 95          | 95                 | 89        | 88    | 95    | 86       | 88      | 93         | 86    | 88                  | 91      | 94             | 94           | 94        | 94             | 95     | 92                | 97             |
| 3.c.1: Health Worker Dens       | 8.1    | 4.0   | 6.7   | 5.3      | 3.2      | 6.4     | 5.2  | 5.9       | 11.7             | 7.2   | 6.9         | 7.8                | 5.2       | 5.6   | 5.3   | 5.4      | 5.2     | 7.3        | 5.1   | 8.9                 | 6.0     | 8.7            | 8.9          | 10.2      | 13.1           | 6.6    | 10.4              | 7.5            |
| 5.2.1: Int Partner Viol         | 7.2    | 7.9   | 7.6   | 7.6      | 7.6      | 7.7     | 8.2  | 7.5       | 5.7              | 7.3   | 7.2         | 7.3                | 8.7       | 8.0   | 7.9   | 9.0      | 8.0     | 7.9        | 8.2   | 7.7                 | 7.7     | 7.0            | 6.9          | 6.3       | 6.8            | 6.9    | 6.6               | 6.3            |
| 5.2.2: Non-Int Partner Sex Viol | 0.4    | 0.4   | 0.5   | 0.4      | 0.4      | 0.5     | 0.4  | 0.4       | 0.5              | 0.5   | 0.5         | 0.5                | 0.4       | 0.4   | 0.4   | 0.4      | 0.4     | 0.4        | 0.4   | 0.4                 | 0.4     | 0.5            | 0.5          | 0.3       | 0.5            | 0.5    | 0.5               | 0.5            |
| 6.1.1: Water                    | 9.8    | 24.4  | 9.5   | 17.0     | 23.2     | 9.2     | 25.5 | 12.3      | 3.9              | 8.5   | 10.5        | 7.7                | 15.7      | 12.4  | 14.6  | 23.3     | 12.7    | 12.2       | 14.9  | 9.8                 | 9.8     | 7.1            | 7.6          | 3.8       | 6.7            | 6.1    | 7.0               | 7.5            |
| 6.2.1a: Sanitation              | 23.3   | 43.2  | 51.2  | 39.7     | 63.1     | 47.7    | 54.3 | 54.0      | 5.4              | 29.4  | 45.1        | 42.6               | 44.7      | 30.6  | 36.3  | 56.7     | 32.2    | 30.2       | 56.9  | 36.7                | 27.4    | 14.1           | 10.9         | 4.7       | 7.9            | 17.2   | 19.1              | 18.7           |
| 6.2.1b: Hygiene                 | 19     | 29    | 19    | 24       | 27       | 19      | 30   | 21        | 14               | 17    | 19          | 17                 | 23        | 21    | 22    | 30       | 21      | 21         | 24    | 19                  | 19      | 16             | 17           | 14        | 16             | 16     | 16                | 16             |
| 7.1.2: HH Air Poll              | 5.6    | 6.5   | 2.6   | 4.8      | 8.2      | 3.1     | 9.2  | 8.7       | 0.2              | 2.8   | 4.7         | 4.4                | 10.6      | 10.2  | 9.4   | 13.4     | 11.0    | 8.2        | 12.4  | 7.6                 | 7.8     | 5.8            | 6.0          | 0.9       | 1.2            | 5.6    | 7.1               | 7.0            |
| 8.8.1: Occ Burden               | 704    | 803   | 652   | 737      | 748      | 701     | 752  | 687       | 502              | 690   | 678         | 692                | 732       | 778   | 705   | 794      | 724     | 763        | 742   | 679                 | 687     | 640            | 684          | 701       | 576            | 695    | 733               | 721            |
| 11.6.2: Mean PM2.5              | 12.7   | 13.4  | 13.4  | 12.4     | 13.2     | 11.5    | 13.0 | 19.0      | 37.6             | 30.6  | 17.7        | 11.5               | 7.4       | 10.6  | 9.0   | 11.8     | 7.4     | 7.6        | 10.8  | 7.8                 | 7.2     | 10.4           | 14.2         | 13.5      | 13.6           | 9.2    | 10.2              | 9.7            |
| 16.1.1: Homicide                | 28     | 30    | 36    | 35       | 35       | 28      | 37   | 27        | 23               | 38    | 32          | 24                 | 53        | 34    | 35    | 23       | 35      | 46         | 19    | 45                  | 49      | 35             | 23           | 14        | 35             | 27     | 26                | 12             |
| 16.1.2: Conflict Mort           | 0.0    | 0.0   | 0.0   | 0.0      | 0.0      | 0.0     | 0.0  | 0.0       | 0.0              | 0.0   | 0.0         | 0.0                | 0.0       | 0.0   | 0.0   | 0.0      | 0.0     | 0.0        | 0.0   | 0.0                 | 0.0     | 0.0            | 0.0          | 0.0       | 0.0            | 0.0    | 0.0               | 0.0            |
| 16.1.3a: Physical Violence      | 4.4    | 4.4   | 4.4   | 4.4      | 4.4      | 4.4     | 4.4  | 4.4       | 4.4              | 4.4   | 4.4         | 4.4                | 4.4       | 4.4   | 4.4   | 4.4      | 4.4     | 4.4        | 4.4   | 4.4                 | 4.4     | 4.4            | 4.4          | 4.4       | 4.4            | 4.4    | 4.4               | 4.4            |
| 16.1.3c: Sexual Violence        | 1.8    | 1.8   | 1.8   | 1.8      | 1.7      | 1.8     | 1.8  | 1.7       | 1.9              | 1.8   | 1.8         | 1.7                | 1.7       | 1.7   | 1.8   | 1.7      | 1.7     | 1.8        | 1.7   | 1.8                 | 1.8     | 1.8            | 1.7          | 1.8       | 1.8            | 1.8    | 1.8               | 1.8            |
| 16.2.3: Child Sex Abuse         | 6.2    | 5.9   | 5.9   | 5.9      | 5.9      | 5.9     | 6.8  | 5.9       | 6.0              | 3.7   | 5.9         | 5.9                | 6.0       | 3.5   | 7.2   | 4.4      | 6.0     | 6.3        | 6.0   | 6.0                 | 6.0     | 5.9            | 5.9          | 8.3       | 4.8            | 8.6    | 2.7               | 7.7            |
| 17.19.2c: Cert Death Reg        | 83     | 82    | 82    | 80       | 82       | 84      | 80   | 85        | 91               | 86    | 84          | 89                 | 82        | 73    | 80    | 80       | 80      | 83         | 82    | 84                  | 82      | 90             | 80           | 85        | 81             | 86     | 86                | 86             |
